# Supplementary material for: Amylase activity is associated with AMY2B copy numbers in dog: implications for dog domestication, diet and diabetes
Source: PubMed Central journal article supplement — Anim Genet. 2014 Jun 28;45(5):716–22. doi: 10.1111/age.12179 (PMC4329415; doi:10.1111/age.12179), 2014-06-28
Supplement: age0045-0716-sd4.pdf [file age0045-0716-sd4.pdf]

**Table S3.** Mean diploid *AMY2B* copy number in diabetic mellitus cases and controls, respectively, for 5 dog breeds with high risk of developing diabetes. ‘N’ refers to the number of dogs sampled.

| <b>Breed</b>       | <b>Status</b> | <b>Diploid<br/><i>AMY2B</i> copy<br/>number</b> | <b>Standard<br/>deviation</b> | <b>N</b> |
|--------------------|---------------|-------------------------------------------------|-------------------------------|----------|
| Samoyed            | Control       | 6.875                                           | 2.642375                      | 8        |
|                    | Diabetes      | 8                                               | 3.854496                      | 8        |
| Norwegian Elkhound | Control       | 11.875                                          | 1.356203                      | 8        |
|                    | Diabetes      | 11.75                                           | 1.488048                      | 8        |
| Border Collie      | Control       | 12.875                                          | 1.125992                      | 8        |
|                    | Diabetes      | 12                                              | 2.507133                      | 8        |
| Swedish Elkhound   | Control       | 13.75                                           | 2.492847                      | 8        |
|                    | Diabetes      | 12.25                                           | 1.488048                      | 8        |
| Australian Terrier | Control       | 13.625                                          | 1.06066                       | 8        |
|                    | Diabetes      | 13                                              | 1.85164                       | 8        |
